# Supplementary material
Source: Springer Nature journal article supplement (https://www.springermedizin.de/resource/supplementary/12913_2006_547_MOESM3_ESM.pdf/9534994)

# CEAC

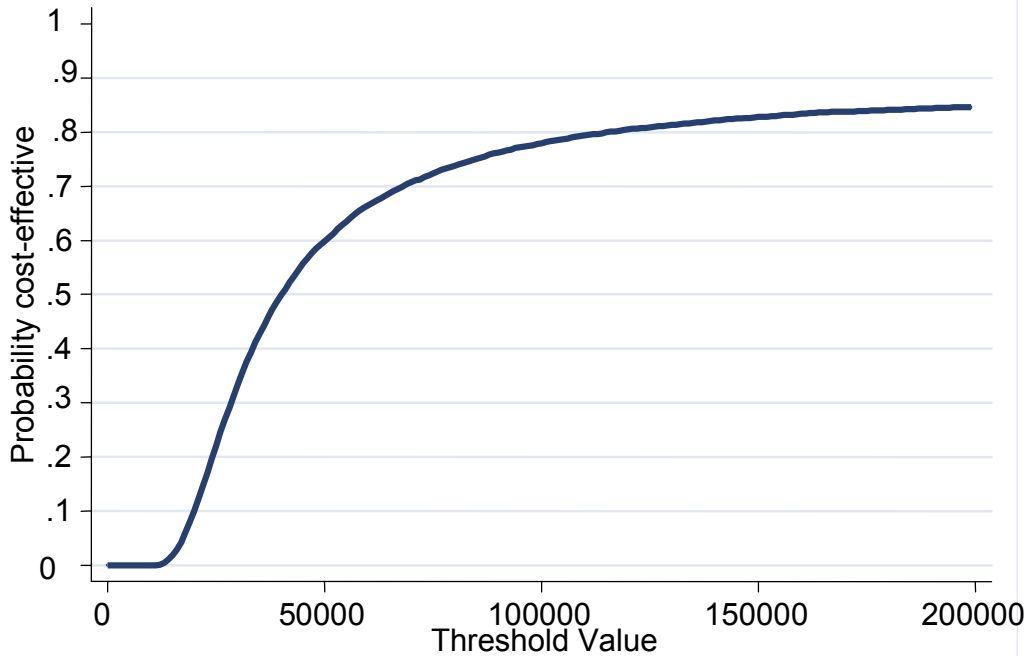

Supplement: MOESM3 [file 9534994]
